# Supplementary material
Source: publisher figshare collection journal article supplement (https://springernature.figshare.com/ndownloader/files/17781734)
Supplement: Supplementary file [file 17781734]

**A**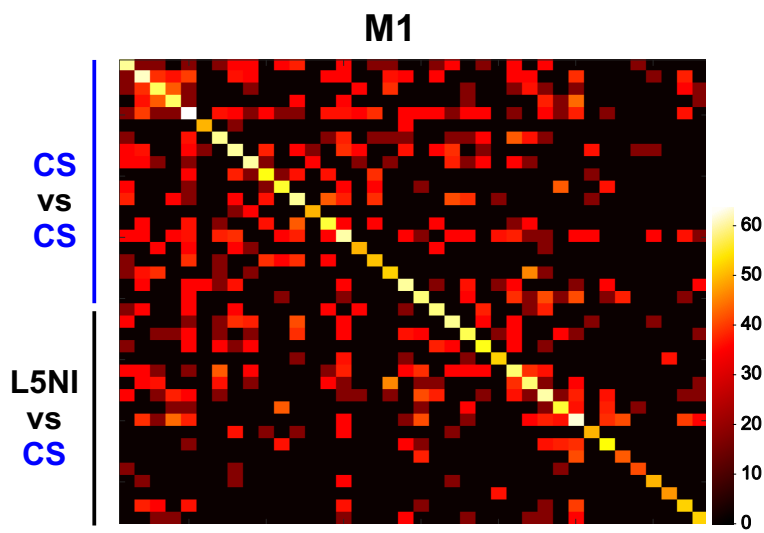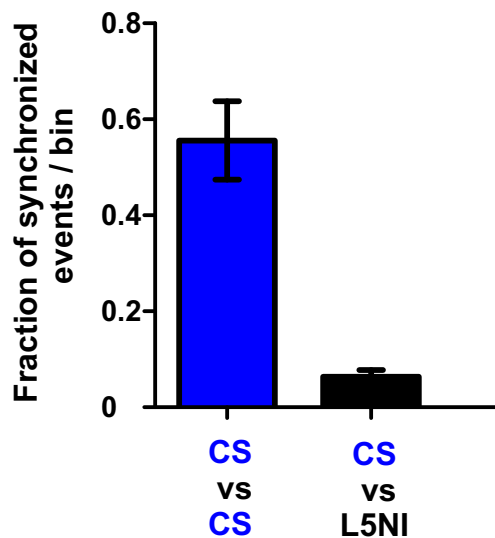**B**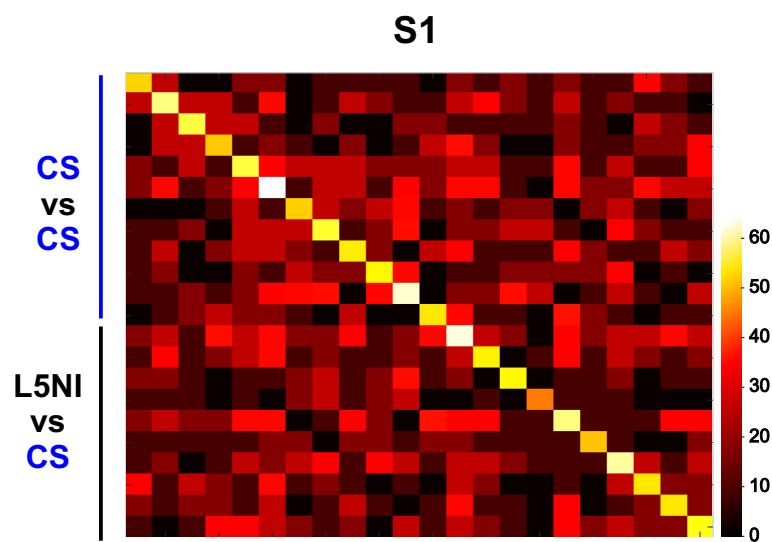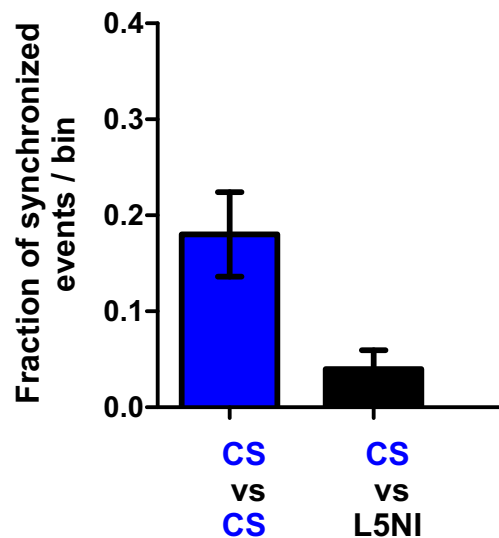

**Figure S3. Co-activation between CS neurons in different areas of the sensorimotor cortex is higher than non-identified layer 5 cells.** **A**, co-activation matrix showing the number of calcium events that simultaneously occurs in all pairs of imaged neurons in motor cortex (M1). The graph below shows the fraction of synchronized events (mean±SE) occurring in CS and non-identified neurons computed in 7 experiments for 200 ms peri-event intervals. **B**, the same as **A** but for neurons located in somatosensory cortex (S1).
